# Supplementary material for: Generating porosity during olivine carbonation via dissolution channels and expansion cracks
Source: Copernicus journal article supplement (doi:10.5194/se-9-879-2018), 2018-07-13
Supplement: Supplementary file 1 [file se-9-879-2018-supplement.zip]

Archive with 5 entries (5 files):
- S3_Porosity Evolution_ Subvolume2.mp4
- S4_Porosity Evolution_ Subvolume2_Rotation.mp4
- se-9-879-2018-supplement-title-page.pdf
- S1_Dissolution Channel.mpg
- S2_Porosity Evolution_ Subvolume1.mp4
