# Supplementary material for: Generating porosity during olivine carbonation via dissolution channels and expansion cracks
Source: Copernicus journal article supplement (doi:10.5194/se-9-879-2018), 2018-07-13
Supplement: Supplementary file 1 [file se-9-879-2018-supplement.zip › se-9-879-2018-supplement-title-page.pdf]

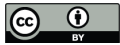

## *Supplement of*

# **Generating porosity during olivine carbonation via dissolution channels and expansion cracks**

**Tiange Xing et al.**

*Correspondence to:* Tiange Xing ([tiange@umd.edu](mailto:tiange@umd.edu))

- [se-9-879-2018-supplement-title-page.pdf](#)
- [S1\\_Dissolution Channel.mpg](#)
- [S2\\_Porosity Evolution\\_ Subvolume1.mp4](#)
- [S3\\_Porosity Evolution\\_ Subvolume2.mp4](#)
- [S4\\_Porosity Evolution\\_ Subvolume2\\_Rotation.mp4](#)

The copyright of individual parts of the supplement might differ from the CC BY 4.0 License.
